# Supplementary material for: 5-Formylcytosine landscapes of human preimplantation embryos at single-cell resolution
Source: PLoS Biol. 2020 Jul 30;18(7):e3000799. doi: 10.1371/journal.pbio.3000799 (PMC7419013; doi:10.1371/journal.pbio.3000799)
Supplement: S2 Table — (XLSX) [file pbio.3000799.s008.xlsx]

## Sheet: Sheet1
ID No.	Name	Sequence (5'-3')
1	Model1	CCTCACCATCTCAACCAATATTATATTACGCGTATAT5fCGCGTATTTCGCGTTATAATATTGAGGGAGAAGTGGTGAATACTGAATAAGAATGTAGTCCAGGTAGGATGGGTGGTTGATGGTAGTGATAATGTCGGAG
2	Model2	AATGATGTTGGCGAAATCACTTATATTACGCGTATAT5fCGCGTTATTCGCGTTATAACCAAGAGAGTTACAGCAGTTTCAACCACCCATCCTACCTGGACTACATTCTTATTCAGTATATATATGCGTCACCTTCACC
